# Supplementary material for: Potential energy surface of fluoroxene: experiment and theory
Source: Royal Society of Chemistry journal article supplement (doi:10.1039/c5cp06522d), 2015-12-18

ASSOCIATED CONTENT

**Supporting Information.**

Table S1. Full list of rotational transitions observed (in MHz) for the parent species of fluoroxene.

| J' | K'_{-1} | K'_{+1} | J'' | K''_{-1} | K''_{+1} | obs. <sup>a</sup> | o.-c. <sup>b</sup> |
|----|---------|---------|-----|----------|----------|-------------------|--------------------|
| 8  | 1       | 8       | 7   | 2        | 5        | 6407.5623         | -0.0070            |
| 3  | 1       | 3       | 2   | 1        | 2        | 6467.4818         | -0.0025            |
| 3  | 0       | 3       | 2   | 0        | 2        | 6542.9786         | -0.0038            |
| 3  | 2       | 2       | 2   | 2        | 1        | 6545.3498         | -0.0039            |
| 3  | 2       | 1       | 2   | 2        | 0        | 6547.7485         | -0.0032            |
| 3  | 1       | 2       | 2   | 1        | 1        | 6622.5104         | -0.0026            |
| 14 | 1       | 13      | 14  | 0        | 14       | 6783.5889         | -0.0027            |
| 11 | 2       | 10      | 10  | 3        | 7        | 7185.9314         | -0.0143            |
| 14 | 3       | 11      | 13  | 4        | 10       | 7271.0895         | -0.0018            |
| 15 | 1       | 14      | 15  | 0        | 15       | 7365.9054         | -0.0104            |
| 11 | 2       | 9       | 10  | 3        | 8        | 7610.3994         | -0.0092            |
| 2  | 1       | 2       | 1   | 0        | 1        | 7626.9890         | -0.0017            |
| 5  | 0       | 5       | 4   | 1        | 4        | 7807.0289         | -0.0071            |
| 3  | 3       | 1       | 4   | 2        | 2        | 7969.2800         | -0.0071            |
| 3  | 3       | 0       | 4   | 2        | 3        | 7978.2675         | -0.0131            |
| 16 | 1       | 15      | 16  | 0        | 16       | 8001.3530         | -0.0061            |
| 6  | 4       | 3       | 7   | 3        | 4        | 8105.2969         | -0.0024            |
| 6  | 4       | 2       | 7   | 3        | 5        | 8106.2079         | -0.0055            |
| 9  | 1       | 9       | 8   | 2        | 6        | 8298.1170         | -0.0081            |
| 8  | 1       | 7       | 7   | 2        | 6        | 8341.0917         | -0.0081            |
| 16 | 2       | 14      | 16  | 1        | 15       | 8382.1935         | 0.0077             |
| 14 | 2       | 12      | 14  | 1        | 13       | 8455.1633         | -0.0004            |
| 19 | 2       | 17      | 19  | 1        | 18       | 8582.2291         | 0.0106             |
| 4  | 1       | 4       | 3   | 1        | 3        | 8622.6110         | -0.0049            |
| 12 | 2       | 10      | 12  | 1        | 11       | 8650.1564         | -0.0156            |
| 17 | 1       | 16      | 17  | 0        | 17       | 8688.5664         | -0.0028            |
| 4  | 0       | 4       | 3   | 0        | 3        | 8721.1732         | -0.0023            |
| 4  | 2       | 3       | 3   | 2        | 2        | 8726.6590         | -0.0050            |
| 4  | 3       | 1       | 3   | 3        | 0        | 8728.2853         | -0.0018            |
| 4  | 3       | 2       | 3   | 3        | 1        | 8728.2853         | -0.0018            |
| 4  | 2       | 2       | 3   | 2        | 1        | 8732.6499         | -0.0056            |
| 11 | 2       | 9       | 11  | 1        | 10       | 8780.0529         | 0.0008             |
| 4  | 1       | 3       | 3   | 1        | 2        | 8829.2950         | -0.0048            |
| 10 | 2       | 8       | 10  | 1        | 9        | 8923.9138         | 0.0083             |
| 9  | 2       | 7       | 9   | 1        | 8        | 9075.9590         | -0.0045            |
| 8  | 2       | 6       | 8   | 1        | 7        | 9230.5879         | -0.0040            |
| 18 | 4       | 15      | 17  | 5        | 12       | 9300.8667         | -0.0093            |
| 7  | 2       | 5       | 7   | 1        | 6        | 9382.4335         | -0.0049            |
| 18 | 1       | 17      | 18  | 0        | 18       | 9425.1993         | -0.0086            |
| 15 | 3       | 12      | 14  | 4        | 11       | 9490.7339         | -0.0158            |
| 6  | 2       | 4       | 6   | 1        | 5        | 9526.5523         | -0.0059            |
| 5  | 2       | 3       | 5   | 1        | 4        | 9658.5119         | 0.0003             |

|    |   |    |    |   |    |            |         |
|----|---|----|----|---|----|------------|---------|
| 3  | 1 | 3  | 2  | 0 | 2  | 9731.4828  | -0.0025 |
| 4  | 2 | 2  | 4  | 1 | 3  | 9774.4321  | -0.0017 |
| 3  | 2 | 1  | 3  | 1 | 2  | 9871.0754  | -0.0026 |
| 12 | 2 | 10 | 11 | 3 | 9  | 9911.0441  | 0.0038  |
| 2  | 2 | 0  | 2  | 1 | 1  | 9945.8363  | -0.0031 |
| 6  | 0 | 6  | 5  | 1 | 5  | 10099.6868 | -0.0083 |
| 2  | 2 | 1  | 2  | 1 | 2  | 10100.2718 | -0.0015 |
| 3  | 2 | 2  | 3  | 1 | 3  | 10178.1388 | -0.0039 |
| 4  | 2 | 3  | 4  | 1 | 4  | 10282.1868 | -0.0041 |
| 5  | 4 | 2  | 6  | 3 | 3  | 10290.3383 | -0.0152 |
| 5  | 4 | 1  | 6  | 3 | 4  | 10290.7027 | -0.0164 |
| 5  | 2 | 4  | 5  | 1 | 5  | 10412.5935 | -0.0019 |
| 11 | 6 | 5  | 12 | 5 | 8  | 10553.3479 | 0.0022  |
| 11 | 6 | 6  | 12 | 5 | 7  | 10553.3479 | 0.0050  |
| 6  | 2 | 5  | 6  | 1 | 6  | 10569.5582 | -0.0045 |
| 14 | 7 | 7  | 15 | 6 | 10 | 10683.7291 | -0.0070 |
| 14 | 7 | 8  | 15 | 6 | 9  | 10683.7291 | -0.0070 |
| 9  | 1 | 8  | 8  | 2 | 7  | 10744.4276 | 0.0001  |
| 9  | 1 | 8  | 8  | 2 | 7  | 10744.4276 | 0.0001  |
| 7  | 2 | 6  | 7  | 1 | 7  | 10753.3299 | 0.0127  |
| 5  | 1 | 5  | 4  | 1 | 4  | 10777.1580 | -0.0054 |
| 5  | 0 | 5  | 4  | 0 | 4  | 10896.9776 | -0.0016 |
| 5  | 2 | 4  | 4  | 2 | 3  | 10907.5616 | -0.0063 |
| 5  | 2 | 3  | 4  | 2 | 2  | 10919.5277 | -0.0083 |
| 8  | 2 | 7  | 8  | 1 | 8  | 10964.0827 | -0.0073 |
| 5  | 1 | 4  | 4  | 1 | 3  | 11035.4497 | -0.0085 |
| 9  | 2 | 8  | 9  | 1 | 9  | 11202.1070 | 0.0009  |
| 13 | 2 | 12 | 12 | 3 | 9  | 11440.2867 | -0.0016 |
| 10 | 2 | 9  | 10 | 1 | 10 | 11467.5739 | 0.0047  |
| 11 | 2 | 10 | 11 | 1 | 11 | 11760.6520 | 0.0042  |
| 4  | 1 | 4  | 3  | 0 | 3  | 11811.1152 | -0.0035 |
| 11 | 1 | 11 | 10 | 2 | 8  | 11927.0634 | 0.0050  |
| 12 | 2 | 11 | 12 | 1 | 12 | 12081.4649 | 0.0044  |
| 13 | 2 | 11 | 12 | 3 | 10 | 12239.8142 | 0.0049  |
| 13 | 2 | 12 | 13 | 1 | 13 | 12430.0655 | 0.0049  |
| 7  | 5 | 2  | 8  | 4 | 5  | 12607.0387 | 0.0043  |
| 7  | 5 | 3  | 8  | 4 | 4  | 12607.0387 | 0.0043  |
| 10 | 6 | 4  | 11 | 5 | 7  | 12738.7377 | 0.0019  |
| 14 | 2 | 13 | 14 | 1 | 14 | 12806.4230 | 0.0001  |
| 6  | 1 | 6  | 5  | 1 | 5  | 12930.9926 | -0.0042 |
| 6  | 0 | 6  | 5  | 0 | 5  | 13069.8116 | -0.0108 |
| 6  | 5 | 1  | 5  | 5 | 0  | 13091.8962 | 0.0048  |
| 6  | 5 | 2  | 5  | 5 | 1  | 13091.8962 | 0.0048  |
| 6  | 4 | 2  | 5  | 4 | 1  | 13092.5520 | 0.0046  |
| 6  | 4 | 3  | 5  | 4 | 2  | 13092.5520 | 0.0046  |
| 6  | 3 | 4  | 5  | 3 | 3  | 13093.7807 | 0.0048  |

|    |   |    |    |   |    |            |         |
|----|---|----|----|---|----|------------|---------|
| 6  | 3 | 3  | 5  | 3 | 2  | 13094.0229 | 0.0035  |
| 6  | 2 | 4  | 5  | 2 | 3  | 13108.8583 | -0.0031 |
| 10 | 1 | 9  | 9  | 2 | 8  | 13169.6460 | 0.0029  |
| 15 | 2 | 14 | 15 | 1 | 15 | 13210.4370 | 0.0056  |
| 6  | 1 | 5  | 5  | 1 | 4  | 13240.8119 | -0.0029 |
| 3  | 2 | 2  | 3  | 0 | 3  | 13366.6374 | -0.0083 |
| 4  | 2 | 3  | 4  | 0 | 4  | 13372.1359 | 0.0016  |
| 5  | 2 | 4  | 5  | 0 | 5  | 13382.7022 | -0.0207 |
| 6  | 2 | 5  | 6  | 0 | 6  | 13400.8556 | -0.0088 |
| 8  | 2 | 7  | 8  | 0 | 8  | 13471.7434 | 0.0030  |
| 9  | 2 | 8  | 9  | 0 | 9  | 13531.3167 | 0.0094  |
| 14 | 2 | 13 | 13 | 3 | 10 | 13543.2659 | 0.0003  |
| 16 | 2 | 15 | 16 | 1 | 16 | 13641.8674 | -0.0010 |
| 12 | 1 | 12 | 11 | 2 | 9  | 13655.5661 | 0.0005  |
| 17 | 3 | 15 | 16 | 4 | 12 | 13795.2119 | 0.0038  |
| 5  | 1 | 5  | 4  | 0 | 4  | 13867.1136 | 0.0069  |
| 17 | 3 | 14 | 16 | 4 | 13 | 13962.4294 | 0.0043  |
| 17 | 2 | 16 | 17 | 1 | 17 | 14100.4103 | 0.0029  |
| 2  | 2 | 1  | 1  | 1 | 0  | 14360.5015 | -0.0011 |
| 2  | 2 | 0  | 1  | 1 | 1  | 14412.7792 | -0.0009 |
| 18 | 2 | 17 | 18 | 1 | 18 | 14585.6108 | 0.0044  |
| 14 | 2 | 12 | 13 | 3 | 11 | 14599.2154 | -0.0006 |
| 8  | 0 | 8  | 7  | 1 | 7  | 14728.4164 | 0.0114  |
| 6  | 5 | 1  | 7  | 4 | 4  | 14790.9718 | 0.0033  |
| 6  | 5 | 2  | 7  | 4 | 3  | 14790.9718 | 0.0033  |
| 19 | 3 | 16 | 19 | 2 | 17 | 14909.8798 | -0.0101 |
| 9  | 6 | 3  | 10 | 5 | 6  | 14923.4116 | -0.0001 |
| 12 | 7 | 5  | 13 | 6 | 8  | 15054.9970 | 0.0014  |
| 12 | 7 | 6  | 13 | 6 | 7  | 15054.9970 | 0.0014  |
| 7  | 1 | 7  | 6  | 1 | 6  | 15083.9999 | 0.0032  |
| 19 | 2 | 18 | 19 | 1 | 19 | 15096.9094 | 0.0032  |
| 18 | 3 | 15 | 18 | 2 | 16 | 15170.2551 | -0.0016 |
| 7  | 0 | 7  | 6  | 0 | 6  | 15239.1699 | 0.0019  |
| 7  | 2 | 6  | 6  | 2 | 5  | 15267.7549 | 0.0039  |
| 7  | 6 | 1  | 6  | 6 | 0  | 15273.6125 | -0.0001 |
| 7  | 5 | 2  | 6  | 5 | 1  | 15274.2290 | 0.0015  |
| 7  | 5 | 3  | 6  | 5 | 2  | 15274.2290 | 0.0015  |
| 7  | 4 | 3  | 6  | 4 | 2  | 15275.2237 | 0.0036  |
| 7  | 4 | 4  | 6  | 4 | 3  | 15275.2237 | 0.0036  |
| 7  | 3 | 5  | 6  | 3 | 4  | 15277.0580 | 0.0045  |
| 7  | 3 | 4  | 6  | 3 | 3  | 15277.6064 | 0.0053  |
| 7  | 2 | 5  | 6  | 2 | 4  | 15301.0673 | 0.0022  |
| 13 | 1 | 13 | 12 | 2 | 10 | 15320.2480 | 0.0029  |
| 17 | 3 | 14 | 17 | 2 | 15 | 15415.3392 | -0.0007 |
| 7  | 1 | 6  | 6  | 1 | 5  | 15445.1918 | 0.0070  |
| 11 | 1 | 10 | 10 | 2 | 9  | 15615.7749 | 0.0018  |

|    |   |    |    |   |    |            |         |
|----|---|----|----|---|----|------------|---------|
| 20 | 2 | 19 | 20 | 1 | 20 | 15633.6343 | 0.0034  |
| 16 | 3 | 13 | 16 | 2 | 14 | 15641.2234 | 0.0018  |
| 15 | 3 | 12 | 15 | 2 | 13 | 15844.9765 | -0.0020 |
| 6  | 1 | 6  | 5  | 0 | 5  | 15901.1280 | 0.0037  |
| 14 | 3 | 11 | 14 | 2 | 12 | 16024.7405 | -0.0004 |
| 13 | 3 | 10 | 13 | 2 | 11 | 16179.6936 | 0.0002  |
| 18 | 3 | 15 | 17 | 4 | 14 | 16218.8242 | 0.0115  |
| 12 | 3 | 9  | 12 | 2 | 10 | 16310.0175 | 0.0001  |
| 11 | 3 | 8  | 11 | 2 | 9  | 16416.7789 | 0.0014  |
| 3  | 2 | 2  | 2  | 1 | 1  | 16490.5909 | -0.0025 |
| 10 | 3 | 7  | 10 | 2 | 8  | 16501.7619 | 0.0014  |
| 9  | 3 | 6  | 9  | 2 | 7  | 16567.2875 | 0.0031  |
| 8  | 3 | 5  | 8  | 2 | 6  | 16616.0035 | 0.0029  |
| 3  | 2 | 1  | 2  | 1 | 2  | 16648.6296 | 0.0048  |
| 7  | 3 | 4  | 7  | 2 | 5  | 16650.7115 | 0.0075  |
| 6  | 3 | 3  | 6  | 2 | 4  | 16674.1728 | 0.0048  |
| 5  | 3 | 2  | 5  | 2 | 3  | 16689.0182 | 0.0081  |
| 4  | 3 | 1  | 4  | 2 | 2  | 16697.6027 | 0.0110  |
| 3  | 3 | 0  | 3  | 2 | 1  | 16701.9529 | 0.0057  |
| 4  | 3 | 2  | 4  | 2 | 3  | 16706.5450 | -0.0053 |
| 5  | 3 | 3  | 5  | 2 | 4  | 16709.8531 | 0.0075  |
| 6  | 3 | 4  | 6  | 2 | 5  | 16715.6628 | 0.0055  |
| 7  | 3 | 5  | 7  | 2 | 6  | 16724.9637 | 0.0040  |
| 8  | 3 | 6  | 8  | 2 | 7  | 16738.8614 | 0.0043  |
| 9  | 3 | 7  | 9  | 2 | 8  | 16758.5730 | 0.0036  |
| 10 | 3 | 8  | 10 | 2 | 9  | 16785.4168 | 0.0004  |
| 11 | 3 | 9  | 11 | 2 | 10 | 16820.8013 | 0.0009  |
| 12 | 3 | 10 | 12 | 2 | 11 | 16866.1908 | 0.0035  |
| 14 | 1 | 14 | 13 | 2 | 11 | 16916.5343 | -0.0016 |
| 13 | 3 | 11 | 13 | 2 | 12 | 16923.0896 | 0.0015  |
| 5  | 5 | 0  | 6  | 4 | 3  | 16974.2961 | -0.0011 |
| 5  | 5 | 1  | 6  | 4 | 2  | 16974.2961 | -0.0011 |
| 15 | 2 | 13 | 14 | 3 | 12 | 16991.2010 | -0.0009 |
| 14 | 3 | 12 | 14 | 2 | 13 | 16993.0360 | -0.0024 |
| 9  | 0 | 9  | 8  | 1 | 8  | 17057.8817 | 0.0040  |
| 15 | 3 | 13 | 15 | 2 | 14 | 17077.5760 | -0.0035 |
| 8  | 6 | 2  | 9  | 5 | 5  | 17107.4741 | -0.0014 |
| 8  | 6 | 3  | 9  | 5 | 4  | 17107.4741 | -0.0014 |
| 16 | 3 | 14 | 16 | 2 | 15 | 17178.2326 | -0.0054 |
| 8  | 1 | 8  | 7  | 1 | 7  | 17236.0595 | 0.0043  |
| 17 | 3 | 15 | 17 | 2 | 16 | 17296.5017 | -0.0052 |
| 8  | 0 | 8  | 7  | 0 | 7  | 17404.5415 | 0.0062  |
| 8  | 2 | 7  | 7  | 2 | 6  | 17446.8302 | 0.0021  |
| 8  | 7 | 1  | 7  | 7 | 0  | 17455.2440 | -0.0034 |
| 8  | 7 | 2  | 7  | 7 | 1  | 17455.2440 | -0.0034 |
| 8  | 6 | 2  | 7  | 6 | 1  | 17455.8609 | -0.0065 |

|    |   |    |    |   |    |            |         |
|----|---|----|----|---|----|------------|---------|
| 8  | 5 | 3  | 7  | 5 | 2  | 17456.7268 | -0.0001 |
| 8  | 4 | 4  | 7  | 4 | 3  | 17458.1619 | -0.0039 |
| 8  | 3 | 6  | 7  | 3 | 5  | 17460.7267 | 0.0012  |
| 8  | 3 | 5  | 7  | 3 | 4  | 17461.8209 | 0.0011  |
| 8  | 2 | 6  | 7  | 2 | 5  | 17496.5269 | 0.0037  |
| 19 | 3 | 17 | 19 | 2 | 18 | 17591.5712 | -0.0046 |
| 8  | 1 | 7  | 7  | 1 | 6  | 17648.3724 | 0.0026  |
| 16 | 2 | 15 | 15 | 3 | 12 | 17685.1910 | -0.0023 |
| 7  | 1 | 7  | 6  | 0 | 6  | 17915.3044 | 0.0060  |
| 12 | 1 | 11 | 11 | 2 | 10 | 18081.6694 | 0.0008  |

---

<sup>a</sup>Observed frequency; <sup>b</sup>Observed-Calculated

Table S2. Full list of rotational transitions observed (in MHz) for the  $^{13}\text{C}_1$  monosubstituted species of fluoroxene

| J' | K' <sub>-1</sub> | K' <sub>+1</sub> | J'' | K'' <sub>-1</sub> | K'' <sub>+1</sub> | obs. <sup>a</sup> | o.-c. <sup>b</sup> |
|----|------------------|------------------|-----|-------------------|-------------------|-------------------|--------------------|
| 3  | 0                | 3                | 2   | 0                 | 2                 | 6403.1692         | -0.0017            |
| 3  | 2                | 2                | 2   | 2                 | 1                 | 6405.4365         | -0.0029            |
| 3  | 1                | 2                | 2   | 1                 | 1                 | 6480.9811         | -0.0033            |
| 2  | 1                | 2                | 1   | 0                 | 1                 | 7539.8187         | 0.0001             |
| 5  | 0                | 5                | 4   | 1                 | 4                 | 7564.7591         | -0.0090            |
| 4  | 1                | 4                | 3   | 1                 | 3                 | 8438.2871         | -0.0010            |
| 4  | 0                | 4                | 3   | 0                 | 3                 | 8534.8757         | -0.0041            |
| 4  | 2                | 3                | 3   | 2                 | 2                 | 8540.1310         | -0.0006            |
| 4  | 3                | 1                | 3   | 3                 | 0                 | 8541.6851         | 0.0019             |
| 4  | 3                | 2                | 3   | 3                 | 1                 | 8541.6851         | 0.0019             |
| 4  | 2                | 2                | 3   | 2                 | 1                 | 8545.8605         | -0.0058            |
| 4  | 1                | 3                | 3   | 1                 | 2                 | 8640.6223         | -0.0032            |
| 8  | 2                | 6                | 8   | 1                 | 7                 | 9257.6625         | -0.0076            |
| 6  | 2                | 4                | 6   | 1                 | 5                 | 9549.4089         | 0.0118             |
| 3  | 1                | 3                | 2   | 0                 | 2                 | 9599.2919         | -0.0038            |
| 5  | 2                | 3                | 5   | 1                 | 4                 | 9679.0858         | 0.0057             |
| 4  | 2                | 2                | 4   | 1                 | 3                 | 9792.8533         | -0.0020            |
| 6  | 0                | 6                | 5   | 1                 | 5                 | 9808.8561         | 0.0014             |
| 3  | 2                | 1                | 3   | 1                 | 2                 | 9887.6136         | -0.0010            |
| 2  | 2                | 0                | 2   | 1                 | 1                 | 9960.8570         | -0.0074            |
| 2  | 2                | 1                | 2   | 1                 | 2                 | 10112.0598        | -0.0033            |
| 3  | 2                | 2                | 3   | 1                 | 3                 | 10188.2861        | 0.0000             |
| 4  | 2                | 3                | 4   | 1                 | 4                 | 10290.1271        | -0.0024            |
| 5  | 2                | 4                | 5   | 1                 | 5                 | 10417.7661        | 0.0020             |
| 5  | 1                | 5                | 4   | 1                 | 4                 | 10546.7999        | -0.0001            |
| 6  | 2                | 5                | 6   | 1                 | 6                 | 10571.3963        | 0.0083             |
| 5  | 0                | 5                | 4   | 0                 | 4                 | 10664.2937        | -0.0074            |
| 5  | 2                | 4                | 4   | 2                 | 3                 | 10674.4315        | -0.0030            |
| 5  | 4                | 2                | 4   | 4                 | 1                 | 10676.8468        | -0.0101            |
| 5  | 4                | 1                | 4   | 4                 | 0                 | 10676.8468        | -0.0101            |
| 5  | 3                | 2                | 4   | 3                 | 1                 | 10677.6672        | -0.0053            |
| 5  | 2                | 3                | 4   | 2                 | 2                 | 10685.8835        | -0.0068            |
| 5  | 1                | 4                | 4   | 1                 | 3                 | 10799.6696        | 0.0039             |
| 4  | 1                | 4                | 3   | 0                 | 3                 | 11634.4106        | -0.0023            |
| 6  | 1                | 6                | 5   | 1                 | 5                 | 12654.6302        | 0.0028             |
| 6  | 0                | 6                | 5   | 0                 | 5                 | 12790.8716        | -0.0149            |
| 6  | 2                | 5                | 5   | 2                 | 4                 | 12808.2485        | -0.0026            |
| 6  | 4                | 2                | 5   | 4                 | 1                 | 12812.6388        | 0.0075             |
| 6  | 4                | 3                | 5   | 4                 | 2                 | 12812.6388        | 0.0075             |
| 6  | 3                | 4                | 5   | 3                 | 3                 | 12813.8139        | 0.0005             |
| 6  | 3                | 3                | 5   | 3                 | 2                 | 12814.0423        | 0.0010             |
| 6  | 2                | 4                | 5   | 2                 | 3                 | 12828.2693        | 0.0134             |

|   |   |   |    |   |    |            |         |
|---|---|---|----|---|----|------------|---------|
| 6 | 1 | 5 | 5  | 1 | 4  | 12957.9404 | 0.0016  |
| 5 | 1 | 5 | 4  | 0 | 4  | 13646.3425 | 0.0093  |
| 2 | 2 | 1 | 1  | 1 | 0  | 14281.1862 | -0.0039 |
| 2 | 2 | 0 | 1  | 1 | 1  | 14332.3524 | -0.0025 |
| 7 | 1 | 7 | 6  | 1 | 6  | 14761.6538 | -0.0008 |
| 7 | 0 | 7 | 6  | 0 | 6  | 14914.1138 | -0.0056 |
| 7 | 2 | 6 | 6  | 2 | 5  | 14941.4838 | -0.0003 |
| 7 | 5 | 3 | 6  | 5 | 2  | 14947.6835 | 0.0141  |
| 7 | 5 | 2 | 6  | 5 | 1  | 14947.6835 | 0.0141  |
| 7 | 4 | 3 | 6  | 4 | 2  | 14948.6332 | 0.0079  |
| 7 | 4 | 4 | 6  | 4 | 3  | 14948.6332 | 0.0079  |
| 7 | 3 | 5 | 6  | 3 | 4  | 14950.3921 | 0.0019  |
| 7 | 3 | 4 | 6  | 3 | 3  | 14950.9040 | 0.0013  |
| 7 | 2 | 5 | 6  | 2 | 4  | 14973.3794 | -0.0008 |
| 7 | 1 | 6 | 6  | 1 | 5  | 15115.2680 | -0.0008 |
| 6 | 1 | 6 | 5  | 0 | 5  | 15636.6565 | -0.0027 |
| 2 | 3 | 9 | 12 | 2 | 10 | 16348.1634 | -0.0006 |
| 3 | 2 | 2 | 2  | 1 | 1  | 16365.7371 | 0.0071  |
| 3 | 2 | 1 | 2  | 1 | 2  | 16520.3769 | 0.0052  |
| 9 | 3 | 6 | 9  | 2 | 7  | 16595.3813 | 0.0080  |
| 9 | 0 | 9 | 8  | 1 | 8  | 16621.1875 | -0.0069 |
| 8 | 3 | 5 | 8  | 2 | 6  | 16642.0887 | 0.0010  |
| 4 | 3 | 1 | 4  | 2 | 2  | 16720.2539 | -0.0017 |
| 4 | 3 | 2 | 4  | 2 | 3  | 16728.8143 | -0.0165 |
| 5 | 3 | 3 | 5  | 2 | 4  | 16731.9779 | -0.0054 |
| 6 | 3 | 4 | 6  | 2 | 5  | 16737.5425 | -0.0031 |
| 7 | 3 | 5 | 7  | 2 | 6  | 16746.4581 | 0.0063  |
| 9 | 3 | 7 | 9  | 2 | 8  | 16778.6511 | 0.0066  |
| 8 | 1 | 8 | 7  | 1 | 7  | 16867.7779 | -0.0004 |
| 8 | 0 | 8 | 7  | 0 | 7  | 17033.5313 | -0.0036 |
| 8 | 2 | 7 | 7  | 2 | 6  | 17074.0384 | 0.0011  |
| 8 | 5 | 3 | 7  | 5 | 2  | 17083.5090 | 0.0127  |
| 8 | 5 | 4 | 7  | 5 | 3  | 17083.5090 | 0.0127  |
| 8 | 4 | 4 | 7  | 4 | 3  | 17084.8797 | 0.0037  |
| 8 | 4 | 5 | 7  | 4 | 4  | 17084.8797 | 0.0037  |
| 8 | 3 | 6 | 7  | 3 | 5  | 17087.3506 | 0.0042  |
| 8 | 3 | 5 | 7  | 3 | 4  | 17088.3735 | 0.0030  |
| 8 | 2 | 6 | 7  | 2 | 5  | 17121.6287 | 0.0001  |
| 8 | 1 | 7 | 7  | 1 | 6  | 17271.4650 | -0.0019 |
| 7 | 1 | 7 | 6  | 0 | 6  | 17607.4246 | -0.0027 |
| 4 | 2 | 3 | 3  | 1 | 2  | 18424.8725 | -0.0046 |

<sup>a</sup>Observed frequency; <sup>b</sup>Observed-Calculated



Table S3. Full list of rotational transitions observed (in MHz) for the  $^{13}\text{C}_2$  monosubstituted species of fluoroxene

| J' | K'_{-1} | K'_{+1} | J'' | K''_{-1} | K''_{+1} | obs. <sup>a</sup> | o.-c. <sup>b</sup> |
|----|---------|---------|-----|----------|----------|-------------------|--------------------|
| 3  | 1       | 3       | 2   | 1        | 2        | 6380.9687         | 0.0007             |
| 3  | 0       | 3       | 2   | 0        | 2        | 6455.1686         | -0.0008            |
| 3  | 2       | 2       | 2   | 2        | 1        | 6457.4486         | -0.0034            |
| 3  | 2       | 1       | 2   | 2        | 0        | 6459.7430         | -0.0182            |
| 3  | 1       | 2       | 2   | 1        | 1        | 6533.2500         | -0.0036            |
| 2  | 1       | 2       | 1   | 0        | 1        | 7576.5366         | -0.0003            |
| 5  | 0       | 5       | 4   | 1        | 4        | 7649.8983         | -0.0042            |
| 4  | 1       | 4       | 3   | 1        | 3        | 8507.2871         | 0.0010             |
| 4  | 0       | 4       | 3   | 0        | 3        | 8604.1924         | -0.0023            |
| 4  | 2       | 3       | 3   | 2        | 2        | 8609.4768         | -0.0021            |
| 4  | 3       | 1       | 3   | 3        | 0        | 8611.0438         | 0.0035             |
| 4  | 3       | 2       | 3   | 3        | 1        | 8611.0438         | 0.0035             |
| 4  | 2       | 2       | 3   | 2        | 1        | 8615.2399         | -0.0090            |
| 4  | 1       | 3       | 3   | 1        | 2        | 8710.3111         | -0.0026            |
| 9  | 2       | 7       | 9   | 1        | 8        | 9108.9080         | -0.0073            |
| 8  | 2       | 6       | 8   | 1        | 7        | 9262.2718         | -0.0082            |
| 7  | 2       | 5       | 7   | 1        | 6        | 9412.4863         | -0.0016            |
| 3  | 1       | 3       | 2   | 0        | 2        | 9653.0917         | -0.0023            |
| 5  | 2       | 3       | 5   | 1        | 4        | 9684.8310         | 0.0011             |
| 4  | 2       | 2       | 4   | 1        | 3        | 9798.9603         | 0.0017             |
| 3  | 2       | 1       | 3   | 1        | 2        | 9894.0303         | 0.0068             |
| 6  | 0       | 6       | 5   | 1        | 5        | 9911.6466         | -0.0042            |
| 2  | 2       | 0       | 2   | 1        | 1        | 9967.5172         | 0.0013             |
| 2  | 2       | 1       | 2   | 1        | 2        | 10119.2309        | 0.0021             |
| 3  | 2       | 2       | 3   | 1        | 3        | 10195.7120        | -0.0008            |
| 4  | 2       | 3       | 4   | 1        | 4        | 10297.9019        | -0.0038            |
| 5  | 2       | 4       | 5   | 1        | 5        | 10425.9822        | 0.0031             |
| 6  | 2       | 5       | 6   | 1        | 6        | 10580.1357        | 0.0037             |
| 5  | 1       | 5       | 4   | 1        | 4        | 10633.0432        | 0.0020             |
| 5  | 0       | 5       | 4   | 0        | 4        | 10750.9142        | -0.0043            |
| 7  | 2       | 6       | 7   | 1        | 7        | 10760.5719        | -0.0104            |
| 5  | 2       | 4       | 4   | 2        | 3        | 10761.1185        | 0.0041             |
| 5  | 4       | 2       | 4   | 4        | 1        | 10763.5378        | -0.0146            |
| 5  | 4       | 1       | 4   | 4        | 0        | 10763.5378        | -0.0146            |
| 5  | 2       | 3       | 4   | 2        | 2        | 10772.6341        | -0.0063            |
| 5  | 1       | 4       | 4   | 1        | 3        | 10886.7721        | 0.0030             |
| 4  | 1       | 4       | 3   | 0        | 3        | 11705.2100        | -0.0007            |
| 6  | 1       | 6       | 5   | 1        | 5        | 12758.1133        | 0.0058             |
| 6  | 0       | 6       | 5   | 0        | 5        | 12894.7812        | -0.0080            |
| 6  | 2       | 5       | 5   | 2        | 4        | 12912.2561        | -0.0042            |
| 6  | 5       | 1       | 5   | 5        | 0        | 12916.0387        | 0.0062             |
| 6  | 4       | 2       | 5   | 4        | 1        | 12916.6775        | 0.0092             |

|    |   |    |    |   |    |            |         |
|----|---|----|----|---|----|------------|---------|
| 6  | 4 | 3  | 5  | 4 | 2  | 12916.6775 | 0.0092  |
| 6  | 3 | 4  | 5  | 3 | 3  | 12917.8597 | 0.0027  |
| 6  | 3 | 3  | 5  | 3 | 2  | 12918.0886 | 0.0017  |
| 6  | 1 | 5  | 5  | 1 | 4  | 13062.4598 | 0.0072  |
| 5  | 1 | 5  | 4  | 0 | 4  | 13734.0565 | -0.0005 |
| 2  | 2 | 1  | 1  | 1 | 0  | 14322.6859 | 0.0002  |
| 2  | 2 | 0  | 1  | 1 | 1  | 14374.0262 | -0.0004 |
| 8  | 0 | 8  | 7  | 1 | 7  | 14478.4136 | 0.0058  |
| 7  | 1 | 7  | 6  | 1 | 6  | 14882.3704 | 0.0012  |
| 7  | 0 | 7  | 6  | 0 | 6  | 15035.2868 | -0.0007 |
| 7  | 2 | 6  | 6  | 2 | 5  | 15062.8220 | 0.0025  |
| 7  | 4 | 4  | 6  | 4 | 3  | 15070.0130 | 0.0074  |
| 7  | 4 | 3  | 6  | 4 | 2  | 15070.0130 | 0.0074  |
| 7  | 3 | 5  | 6  | 3 | 4  | 15071.7833 | 0.0033  |
| 7  | 3 | 4  | 6  | 3 | 3  | 15072.3000 | 0.0031  |
| 7  | 2 | 5  | 6  | 2 | 4  | 15094.9102 | 0.0001  |
| 7  | 1 | 6  | 6  | 1 | 5  | 15237.1772 | -0.0099 |
| 6  | 1 | 6  | 5  | 0 | 5  | 15741.2475 | 0.0015  |
| 3  | 2 | 2  | 2  | 1 | 1  | 16424.3917 | 0.0012  |
| 14 | 1 | 14 | 13 | 2 | 11 | 16565.2264 | 0.0004  |
| 3  | 2 | 1  | 2  | 1 | 2  | 16579.5690 | 0.0015  |
| 7  | 3 | 4  | 7  | 2 | 5  | 16686.5397 | -0.0049 |
| 5  | 3 | 2  | 5  | 2 | 3  | 16723.4583 | -0.0002 |
| 4  | 3 | 1  | 4  | 2 | 2  | 16731.7291 | 0.0028  |
| 4  | 3 | 2  | 4  | 2 | 3  | 16740.3442 | -0.0098 |
| 6  | 3 | 4  | 6  | 2 | 5  | 16749.1247 | 0.0020  |
| 8  | 3 | 6  | 8  | 2 | 7  | 16771.4810 | 0.0078  |
| 9  | 0 | 9  | 8  | 1 | 8  | 16777.0605 | -0.0015 |
| 9  | 3 | 7  | 9  | 2 | 8  | 16790.4783 | 0.0075  |
| 8  | 1 | 8  | 7  | 1 | 7  | 17005.7212 | -0.0008 |
| 8  | 0 | 8  | 7  | 0 | 7  | 17171.9448 | -0.0012 |
| 8  | 2 | 7  | 7  | 2 | 6  | 17212.6994 | 0.0050  |
| 8  | 4 | 4  | 7  | 4 | 3  | 17223.6048 | 0.0038  |
| 8  | 4 | 5  | 7  | 4 | 4  | 17223.6048 | 0.0038  |
| 8  | 3 | 6  | 7  | 3 | 5  | 17226.0824 | -0.0020 |
| 8  | 3 | 5  | 7  | 3 | 4  | 17227.1207 | 0.0031  |
| 8  | 2 | 6  | 7  | 2 | 5  | 17260.5719 | -0.0026 |
| 8  | 1 | 7  | 7  | 1 | 6  | 17410.7793 | -0.0031 |
| 7  | 1 | 7  | 6  | 0 | 6  | 17728.8279 | 0.0021  |

<sup>a</sup>Observed frequency; <sup>b</sup>Observed-Calculated

Table S4. Full list of rotational transitions observed (in MHz) for the  $^{18}\text{O}_3$  monosubstituted species of fluoroxene

| J' | K'_{-1} | K'_{+1} | J'' | K''_{-1} | K''_{+1} | obs. <sup>a</sup> | o.-c. <sup>b</sup> |
|----|---------|---------|-----|----------|----------|-------------------|--------------------|
| 3  | 1       | 3       | 2   | 1        | 2        | 6423.5394         | -0.0020            |
| 3  | 0       | 3       | 2   | 0        | 2        | 6500.8317         | 0.0004             |
| 3  | 2       | 2       | 2   | 2        | 1        | 6503.3425         | 0.0012             |
| 3  | 2       | 1       | 2   | 2        | 0        | 6505.8948         | 0.0168             |
| 3  | 1       | 2       | 2   | 1        | 1        | 6582.3800         | -0.0075            |
| 2  | 1       | 2       | 1   | 0        | 1        | 7571.8102         | -0.0035            |
| 5  | 0       | 5       | 4   | 1        | 4        | 7767.5153         | -0.0023            |
| 4  | 1       | 4       | 3   | 1        | 3        | 8563.9844         | -0.0014            |
| 4  | 0       | 4       | 3   | 0        | 3        | 8664.8108         | -0.0018            |
| 4  | 2       | 3       | 3   | 2        | 2        | 8670.6201         | -0.0003            |
| 4  | 2       | 2       | 3   | 2        | 1        | 8676.9576         | -0.0005            |
| 5  | 2       | 3       | 5   | 1        | 4        | 9574.5493         | 0.0073             |
| 3  | 1       | 3       | 2   | 0        | 2        | 9660.4038         | -0.0045            |
| 4  | 2       | 2       | 4   | 1        | 3        | 9692.8760         | -0.0002            |
| 3  | 2       | 1       | 3   | 1        | 2        | 9791.6662         | -0.0096            |
| 2  | 2       | 0       | 2   | 1        | 1        | 9868.1784         | -0.0072            |
| 2  | 2       | 1       | 2   | 1        | 2        | 10026.4035        | 0.0007             |
| 6  | 0       | 6       | 5   | 1        | 5        | 10048.3016        | 0.0025             |
| 4  | 2       | 3       | 4   | 1        | 4        | 10212.8355        | -0.0015            |
| 5  | 2       | 4       | 5   | 1        | 5        | 10346.4927        | -0.0010            |
| 5  | 1       | 5       | 4   | 1        | 4        | 10703.8095        | -0.0040            |
| 5  | 0       | 5       | 4   | 0        | 4        | 10826.2647        | -0.0032            |
| 5  | 2       | 4       | 4   | 2        | 3        | 10837.4663        | -0.0038            |
| 5  | 2       | 3       | 4   | 2        | 2        | 10850.1235        | -0.0052            |
| 5  | 1       | 4       | 4   | 1        | 3        | 10968.4698        | 0.0067             |
| 4  | 1       | 4       | 3   | 0        | 3        | 11723.5594        | -0.0035            |
| 7  | 0       | 7       | 6   | 1        | 6        | 12344.6289        | -0.0123            |
| 6  | 0       | 6       | 5   | 0        | 5        | 12984.6032        | 0.0083             |
| 6  | 2       | 5       | 5   | 2        | 4        | 13003.7846        | 0.0016             |
| 6  | 4       | 2       | 5   | 4        | 1        | 13008.6485        | 0.0076             |
| 6  | 3       | 3       | 5   | 3        | 2        | 13010.1999        | 0.0034             |
| 6  | 2       | 4       | 5   | 2        | 3        | 13025.8805        | -0.0024            |
| 5  | 1       | 5       | 4   | 0        | 4        | 13762.5728        | 0.0089             |
| 2  | 2       | 0       | 1   | 1        | 1        | 14309.6639        | 0.0006             |
| 8  | 0       | 8       | 7   | 1        | 7        | 14653.2266        | -0.0040            |
| 7  | 1       | 7       | 6   | 1        | 6        | 14981.0825        | -0.0004            |
| 7  | 0       | 7       | 6   | 0        | 6        | 15139.2296        | -0.0001            |
| 7  | 2       | 6       | 6   | 2        | 5        | 15169.4533        | 0.0011             |
| 7  | 3       | 5       | 6   | 3        | 4        | 15179.2942        | 0.0064             |
| 7  | 3       | 4       | 6   | 3        | 3        | 15179.8924        | 0.0066             |
| 7  | 2       | 5       | 6   | 2        | 4        | 15204.6765        | 0.0015             |
| 7  | 1       | 6       | 6   | 1        | 5        | 15351.1283        | -0.0006            |

|   |   |   |   |   |   |            |         |
|---|---|---|---|---|---|------------|---------|
| 6 | 1 | 6 | 5 | 0 | 5 | 15779.1752 | -0.0082 |
| 3 | 2 | 2 | 2 | 1 | 1 | 16370.9049 | 0.0124  |
| 3 | 2 | 1 | 2 | 1 | 2 | 16532.9146 | -0.0004 |
| 8 | 1 | 8 | 7 | 1 | 7 | 17118.2870 | -0.0001 |
| 8 | 0 | 8 | 7 | 0 | 7 | 17289.6709 | -0.0014 |
| 8 | 2 | 7 | 7 | 2 | 6 | 17334.3699 | -0.0013 |
| 8 | 3 | 6 | 7 | 3 | 5 | 17349.0617 | 0.0028  |
| 8 | 1 | 7 | 7 | 1 | 6 | 17540.6813 | -0.0005 |
| 7 | 1 | 7 | 6 | 0 | 6 | 17775.6639 | -0.0075 |

---

<sup>a</sup>Observed frequency; <sup>b</sup>Observed-Calculated

Table S5. Full list of rotational transitions observed (in MHz) for the  $^{13}\text{C}_4$  monosubstituted species of fluoroxene

| $J'$ | $K'_{-1}$ | $K'_{+1}$ | $J''$ | $K''_{-1}$ | $K''_{+1}$ | obs. <sup>a</sup> | o.-c. <sup>b</sup> |
|------|-----------|-----------|-------|------------|------------|-------------------|--------------------|
| 3    | 1         | 3         | 2     | 1          | 2          | 6463.4831         | -0.0010            |
| 3    | 0         | 3         | 2     | 0          | 2          | 6539.7710         | -0.0008            |
| 3    | 2         | 1         | 2     | 2          | 0          | 6544.6585         | -0.0012            |
| 3    | 1         | 2         | 2     | 1          | 1          | 6620.1878         | -0.0043            |
| 2    | 1         | 2         | 1     | 0          | 1          | 7614.3904         | -0.0016            |
| 5    | 0         | 5         | 4     | 1          | 4          | 7813.7530         | -0.0087            |
| 4    | 1         | 4         | 3     | 1          | 3          | 8617.2646         | -0.0007            |
| 4    | 0         | 4         | 3     | 0          | 3          | 8716.8262         | 0.0005             |
| 4    | 2         | 3         | 3     | 2          | 2          | 8722.4557         | 0.0049             |
| 4    | 3         | 1         | 3     | 3          | 0          | 8724.1119         | -0.0031            |
| 4    | 3         | 2         | 3     | 3          | 1          | 8724.1119         | -0.0031            |
| 4    | 1         | 3         | 3     | 1          | 2          | 8826.1888         | 0.0013             |
| 7    | 2         | 5         | 7     | 1          | 6          | 9347.6773         | -0.0067            |
| 6    | 2         | 4         | 6     | 1          | 5          | 9492.8584         | 0.0021             |
| 5    | 2         | 3         | 5     | 1          | 4          | 9625.9168         | -0.0010            |
| 3    | 1         | 3         | 2     | 0          | 2          | 9717.0002         | -0.0019            |
| 4    | 2         | 2         | 4     | 1          | 3          | 9742.9121         | 0.0016             |
| 3    | 2         | 1         | 3     | 1          | 2          | 9840.5087         | 0.0011             |
| 2    | 2         | 0         | 2     | 1          | 1          | 9916.0386         | -0.0012            |
| 2    | 2         | 1         | 2     | 1          | 2          | 10072.1412        | 0.0027             |
| 6    | 0         | 6         | 5     | 1          | 5          | 10106.3129        | -0.0056            |
| 3    | 2         | 2         | 3     | 1          | 3          | 10150.8565        | -0.0002            |
| 4    | 2         | 3         | 4     | 1          | 4          | 10256.0450        | 0.0029             |
| 5    | 2         | 4         | 5     | 1          | 5          | 10387.8762        | -0.0001            |
| 6    | 2         | 5         | 6     | 1          | 6          | 10546.5699        | -0.0002            |
| 5    | 1         | 5         | 4     | 1          | 4          | 10770.4503        | 0.0017             |
| 5    | 0         | 5         | 4     | 0          | 4          | 10891.4316        | -0.0001            |
| 5    | 2         | 4         | 4     | 2          | 3          | 10902.2895        | 0.0066             |
| 5    | 2         | 3         | 4     | 2          | 2          | 10914.5417        | -0.0046            |
| 5    | 1         | 4         | 4     | 1          | 3          | 11031.5366        | -0.0022            |
| 4    | 1         | 4         | 3     | 0          | 3          | 11794.4966        | 0.0008             |
| 6    | 1         | 6         | 5     | 1          | 5          | 12922.9020        | 0.0011             |
| 6    | 0         | 6         | 5     | 0          | 5          | 13063.0132        | 0.0078             |
| 6    | 2         | 5         | 5     | 2          | 4          | 13081.6029        | 0.0082             |
| 6    | 2         | 4         | 5     | 2          | 3          | 13103.0074        | 0.0009             |
| 6    | 1         | 5         | 5     | 1          | 4          | 13236.0674        | -0.0007            |
| 5    | 1         | 5         | 4     | 0          | 4          | 13848.1271        | 0.0084             |
| 2    | 2         | 1         | 1     | 1          | 0          | 14329.1499        | 0.0026             |
| 2    | 2         | 0         | 1     | 1          | 1          | 14381.9981        | -0.0013            |
| 7    | 1         | 7         | 6     | 1          | 6          | 15074.4994        | -0.0005            |
| 7    | 0         | 7         | 6     | 0          | 6          | 15230.9994        | 0.0012             |
| 7    | 2         | 6         | 6     | 2          | 5          | 15260.2844        | 0.0018             |

|   |   |   |   |   |   |            |         |
|---|---|---|---|---|---|------------|---------|
| 7 | 3 | 4 | 6 | 3 | 3 | 15270.3817 | -0.0003 |
| 7 | 2 | 5 | 6 | 2 | 4 | 15294.4149 | 0.0016  |
| 7 | 1 | 6 | 6 | 1 | 5 | 15439.5881 | 0.0026  |
| 6 | 1 | 6 | 5 | 0 | 5 | 15879.5878 | 0.0000  |
| 3 | 2 | 2 | 2 | 1 | 1 | 16457.6286 | 0.0007  |
| 8 | 3 | 5 | 8 | 2 | 6 | 16565.5689 | -0.0013 |
| 7 | 3 | 4 | 7 | 2 | 5 | 16601.1083 | 0.0047  |
| 3 | 2 | 1 | 2 | 1 | 2 | 16617.4137 | 0.0010  |
| 6 | 3 | 3 | 6 | 2 | 4 | 16625.1342 | -0.0006 |
| 5 | 3 | 2 | 5 | 2 | 3 | 16640.3380 | -0.0002 |
| 3 | 3 | 0 | 3 | 2 | 1 | 16653.5852 | -0.0061 |
| 4 | 3 | 2 | 4 | 2 | 3 | 16658.3087 | -0.0005 |
| 5 | 3 | 3 | 5 | 2 | 4 | 16661.6831 | -0.0035 |
| 6 | 3 | 4 | 6 | 2 | 5 | 16667.6446 | 0.0025  |
| 9 | 0 | 9 | 8 | 1 | 8 | 17064.0736 | 0.0014  |
| 8 | 1 | 8 | 7 | 1 | 7 | 17225.1350 | -0.0015 |
| 8 | 0 | 8 | 7 | 0 | 7 | 17394.9151 | -0.0054 |
| 8 | 2 | 7 | 7 | 2 | 6 | 17438.2442 | 0.0007  |
| 8 | 4 | 4 | 7 | 4 | 3 | 17449.8616 | -0.0006 |
| 8 | 4 | 5 | 7 | 4 | 4 | 17449.8616 | -0.0006 |
| 8 | 3 | 6 | 7 | 3 | 5 | 17452.4759 | -0.0031 |
| 8 | 3 | 5 | 7 | 3 | 4 | 17453.6159 | 0.0001  |
| 8 | 2 | 6 | 7 | 2 | 5 | 17489.1502 | 0.0010  |
| 8 | 1 | 7 | 7 | 1 | 6 | 17641.8841 | -0.0029 |
| 7 | 1 | 7 | 6 | 0 | 6 | 17891.0777 | -0.0045 |

---

<sup>a</sup>Observed frequency; <sup>b</sup>Observed-Calculated

Table S6. Full list of rotational transitions observed (in MHz) for the  $^{13}\text{C}_5$  monosubstituted species of fluoroxene

| J' | K' <sub>-1</sub> | K' <sub>+1</sub> | J'' | K'' <sub>-1</sub> | K'' <sub>+1</sub> | obs. <sup>a</sup> | o.-c. <sup>b</sup> |
|----|------------------|------------------|-----|-------------------|-------------------|-------------------|--------------------|
| 3  | 1                | 3                | 2   | 1                 | 2                 | 6451.6177         | 0.0034             |
| 3  | 0                | 3                | 2   | 0                 | 2                 | 6526.7651         | -0.0013            |
| 3  | 2                | 2                | 2   | 2                 | 1                 | 6529.1088         | -0.0042            |
| 3  | 2                | 1                | 2   | 2                 | 0                 | 6531.4843         | -0.0020            |
| 3  | 1                | 2                | 2   | 1                 | 1                 | 6605.9071         | -0.0023            |
| 2  | 1                | 2                | 1   | 0                 | 1                 | 7619.4274         | -0.0035            |
| 5  | 0                | 5                | 4   | 1                 | 4                 | 7776.0458         | 0.0012             |
| 4  | 1                | 4                | 3   | 1                 | 3                 | 8601.4617         | -0.0010            |
| 4  | 0                | 4                | 3   | 0                 | 3                 | 8699.5823         | -0.0006            |
| 4  | 2                | 3                | 3   | 2                 | 2                 | 8705.0191         | 0.0045             |
| 4  | 3                | 1                | 3   | 3                 | 0                 | 8706.6260         | 0.0056             |
| 4  | 3                | 2                | 3   | 3                 | 1                 | 8706.6260         | 0.0056             |
| 4  | 2                | 2                | 3   | 2                 | 1                 | 8710.9427         | -0.0016            |
| 4  | 1                | 3                | 3   | 1                 | 2                 | 8807.1683         | -0.0007            |
| 10 | 2                | 8                | 10  | 1                 | 9                 | 8936.0578         | 0.0095             |
| 7  | 2                | 5                | 7   | 1                 | 6                 | 9393.7015         | -0.0051            |
| 3  | 1                | 3                | 2   | 0                 | 2                 | 9718.8750         | -0.0013            |
| 4  | 2                | 2                | 4   | 1                 | 3                 | 9784.2530         | -0.0006            |
| 3  | 2                | 1                | 3   | 1                 | 2                 | 9880.4592         | -0.0190            |
| 2  | 2                | 0                | 2   | 1                 | 1                 | 9954.9043         | 0.0029             |
| 6  | 0                | 6                | 5   | 1                 | 5                 | 10062.8572        | -0.0095            |
| 2  | 2                | 1                | 2   | 1                 | 2                 | 10108.6079        | 0.0000             |
| 3  | 2                | 2                | 3   | 1                 | 3                 | 10186.1084        | 0.0016             |
| 4  | 2                | 3                | 4   | 1                 | 4                 | 10289.6638        | 0.0052             |
| 5  | 2                | 4                | 5   | 1                 | 5                 | 10419.4420        | 0.0027             |
| 6  | 2                | 5                | 6   | 1                 | 6                 | 10575.6617        | 0.0086             |
| 5  | 1                | 5                | 4   | 1                 | 4                 | 10750.7361        | 0.0029             |
| 7  | 2                | 6                | 7   | 1                 | 7                 | 10758.5144        | -0.0085            |
| 5  | 0                | 5                | 4   | 0                 | 4                 | 10870.0370        | 0.0025             |
| 5  | 2                | 4                | 4   | 2                 | 3                 | 10880.5088        | -0.0050            |
| 5  | 4                | 2                | 4   | 4                 | 1                 | 10883.0137        | -0.0094            |
| 5  | 4                | 1                | 4   | 4                 | 0                 | 10883.0137        | -0.0094            |
| 5  | 2                | 3                | 4   | 2                 | 2                 | 10892.3605        | 0.0015             |
| 5  | 1                | 4                | 4   | 1                 | 3                 | 11007.8098        | 0.0030             |
| 4  | 1                | 4                | 3   | 0                 | 3                 | 11793.5721        | -0.0006            |
| 7  | 0                | 7                | 6   | 1                 | 6                 | 12365.1883        | 0.0049             |
| 6  | 1                | 6                | 5   | 1                 | 5                 | 12899.2887        | -0.0077            |
| 6  | 0                | 6                | 5   | 0                 | 5                 | 13037.5616        | 0.0063             |
| 6  | 2                | 5                | 5   | 2                 | 4                 | 13055.5062        | -0.0042            |
| 6  | 4                | 2                | 5   | 4                 | 1                 | 13060.0504        | 0.0055             |
| 6  | 4                | 3                | 5   | 4                 | 2                 | 13060.0504        | 0.0055             |
| 6  | 3                | 4                | 5   | 3                 | 3                 | 13061.2648        | 0.0024             |

|   |   |   |   |   |   |            |         |
|---|---|---|---|---|---|------------|---------|
| 6 | 3 | 3 | 5 | 3 | 2 | 13061.5117 | 0.0096  |
| 6 | 2 | 4 | 5 | 2 | 3 | 13076.2001 | 0.0065  |
| 6 | 1 | 5 | 5 | 1 | 4 | 13207.6431 | -0.0081 |
| 5 | 1 | 5 | 4 | 0 | 4 | 13844.7231 | 0.0001  |
| 2 | 2 | 1 | 1 | 1 | 0 | 14358.4978 | -0.0012 |
| 2 | 2 | 0 | 1 | 1 | 1 | 14410.5269 | 0.0010  |
| 8 | 0 | 8 | 7 | 1 | 7 | 14679.8818 | 0.0012  |
| 7 | 1 | 7 | 6 | 1 | 6 | 15047.0335 | -0.0006 |
| 7 | 0 | 7 | 6 | 0 | 6 | 15201.6126 | -0.0005 |
| 7 | 2 | 6 | 6 | 2 | 5 | 15229.9034 | -0.0005 |
| 7 | 2 | 5 | 6 | 2 | 4 | 15262.8737 | -0.0041 |
| 7 | 1 | 6 | 6 | 1 | 5 | 15406.5199 | 0.0005  |
| 3 | 2 | 2 | 2 | 1 | 1 | 16483.4233 | 0.0023  |
| 3 | 2 | 1 | 2 | 1 | 2 | 16640.6954 | 0.0076  |
| 5 | 3 | 2 | 5 | 2 | 3 | 16703.6716 | 0.0007  |
| 4 | 3 | 1 | 4 | 2 | 2 | 16712.1629 | -0.0022 |
| 4 | 3 | 2 | 4 | 2 | 3 | 16721.0296 | -0.0022 |
| 6 | 3 | 4 | 6 | 2 | 5 | 16730.0458 | 0.0012  |
| 8 | 3 | 6 | 8 | 2 | 7 | 16753.0071 | -0.0012 |
| 9 | 0 | 9 | 8 | 1 | 8 | 17003.5568 | 0.0006  |
| 8 | 1 | 8 | 7 | 1 | 7 | 17193.8388 | -0.0009 |
| 8 | 0 | 8 | 7 | 0 | 7 | 17361.7321 | 0.0008  |
| 8 | 2 | 7 | 7 | 2 | 6 | 17403.5876 | -0.0072 |
| 8 | 4 | 4 | 7 | 4 | 3 | 17414.8094 | -0.0002 |
| 8 | 4 | 5 | 7 | 4 | 4 | 17414.8094 | -0.0002 |
| 8 | 3 | 6 | 7 | 3 | 5 | 17417.3553 | 0.0040  |
| 8 | 3 | 5 | 7 | 3 | 4 | 17418.4289 | 0.0006  |
| 8 | 2 | 6 | 7 | 2 | 5 | 17452.7842 | -0.0013 |
| 8 | 1 | 7 | 7 | 1 | 6 | 17604.2157 | 0.0003  |
| 7 | 1 | 7 | 6 | 0 | 6 | 17883.4649 | 0.0009  |

<sup>a</sup>Observed frequency; <sup>b</sup>Observed-Calculated



Table S7. Cartesian coordinates (Å) of fluoroxene atoms for the different structural determinations

|                      | $r_s^a$                                               | $r_o$                         | $r_e$                |
|----------------------|-------------------------------------------------------|-------------------------------|----------------------|
|                      | $a/b/c$                                               | $a/b/c$                       | $a/b/c$              |
| <b>C<sub>1</sub></b> | 3.1484(5) <sup>b</sup> /0.710(2)/[0.000] <sup>c</sup> | 3.152(2)/0.713(3)/[0.000]     | 3.026/0.659/0.000    |
| <b>C<sub>2</sub></b> | 2.4962(6)/-0.456(3)/[0.000]                           | 2.501(2)/-0.461(4)/[0.000]    | 2.368/-0.512/0.000   |
| <b>O<sub>3</sub></b> | 1.1454(13)/-0.654(2)/[0.000]                          | 1.151(3)/-0.655(3)/[0.000]    | 1.020/-0.705/0.000   |
| <b>C<sub>4</sub></b> | 0.316(5)/0.514(3)/[0.000]                             | 0.354(6)/0.519(3)/[0.000]     | 0.249/0.472/0.000    |
| <b>C<sub>5</sub></b> | -1.0746(14)/0.000(1)/[0.000]                          | -1.085(5)/0.068(8)/[0.000]    | -1.205/0.060/0.000   |
| <b>F<sub>6</sub></b> |                                                       | -1.878(6)/1.152(3)/ [0.000]   | -1.974/1.167/0.000   |
| <b>F<sub>7</sub></b> |                                                       | -1.390(6)/-0.650(3)/1.081(3)  | -1.523/-0.660/1.083  |
| <b>F<sub>8</sub></b> |                                                       | -1.390(6)/-0.650(3)/-1.081(3) | -1.523/-0.660/-1.083 |

<sup>a</sup>Substitution ( $r_s$ ), effective ( $r_o$ ) and *ab initio* (MP2/6-311++G(d,p)) equilibrium ( $r_e$ ) structures <sup>b</sup> Standard errors in parentheses in units of the last digit. <sup>c</sup> Values in brackets were fixed in the fitting.

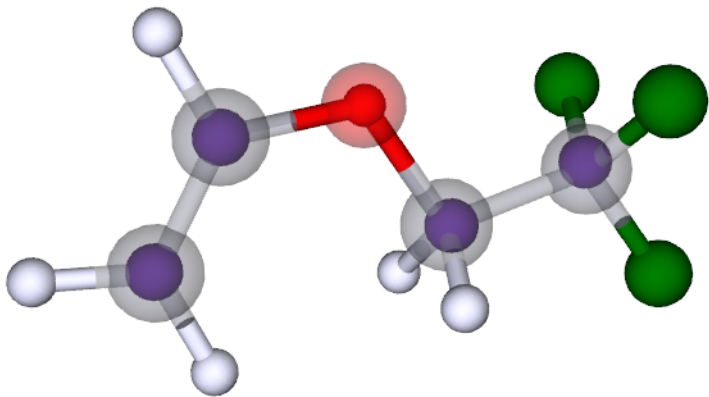

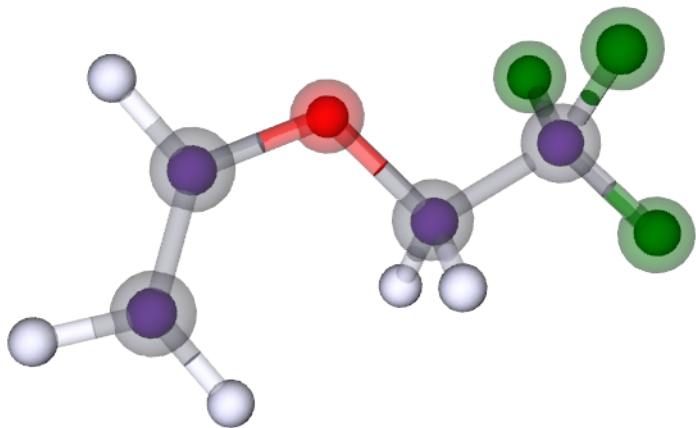

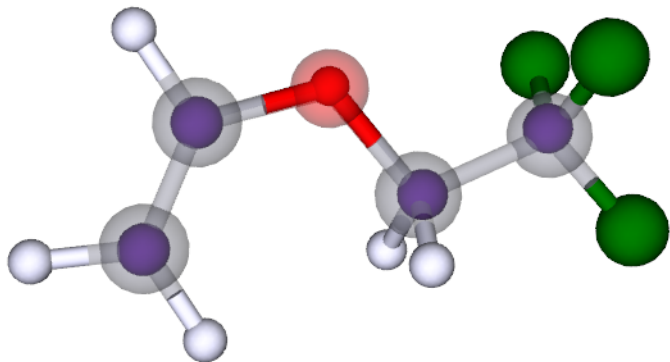

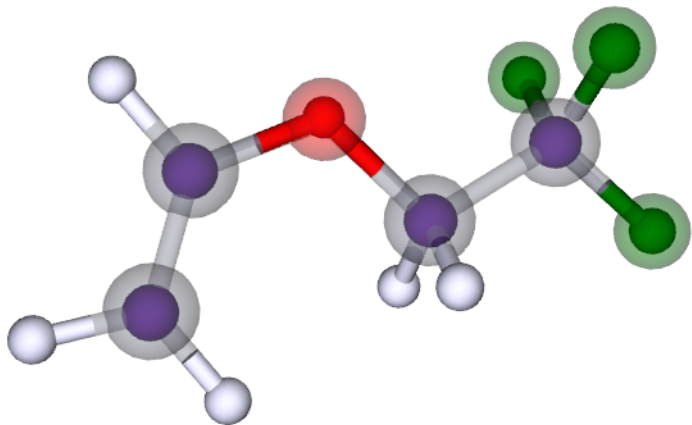

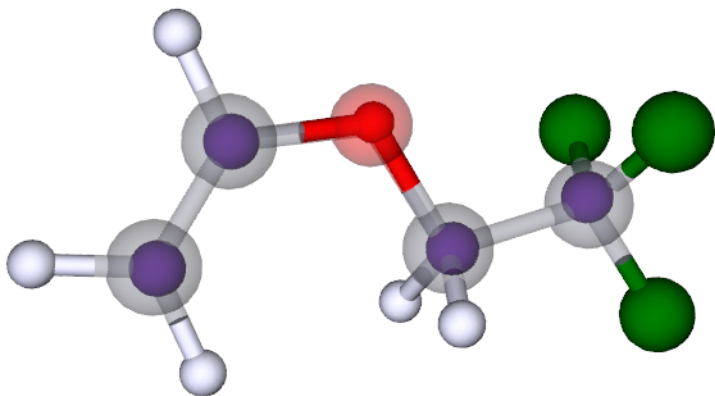

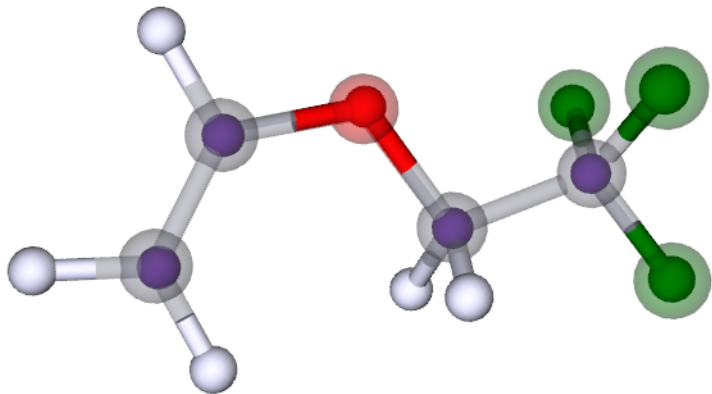

Supplement: c5cp06522d1.pdf [file c5cp06522d1.pdf]
